# Supplementary material for: Bulk De Novo Mitogenome Assembly from Pooled Total DNA Elucidates the Phylogeny of Weevils (Coleoptera: Curculionoidea)
Source: PubMed Central journal article supplement (PMC4104315; doi:10.1093/molbev/msu154), 2014-05-06
Supplement: supp_msu154_Supplementary_Material_S3-S10.pdf [file supp_msu154_Supplementary_Material_S3-S10.pdf]

## SUPPLEMENTARY MATERIAL (S3-S10)

**Supplementary Figure S3.** Observed nucleotide substitution rates (A) and base frequencies (B) of the six PartitionFinder-selected partitions for the 'all genes dataset'. See Table 2 in the text for partition definitions.

A)

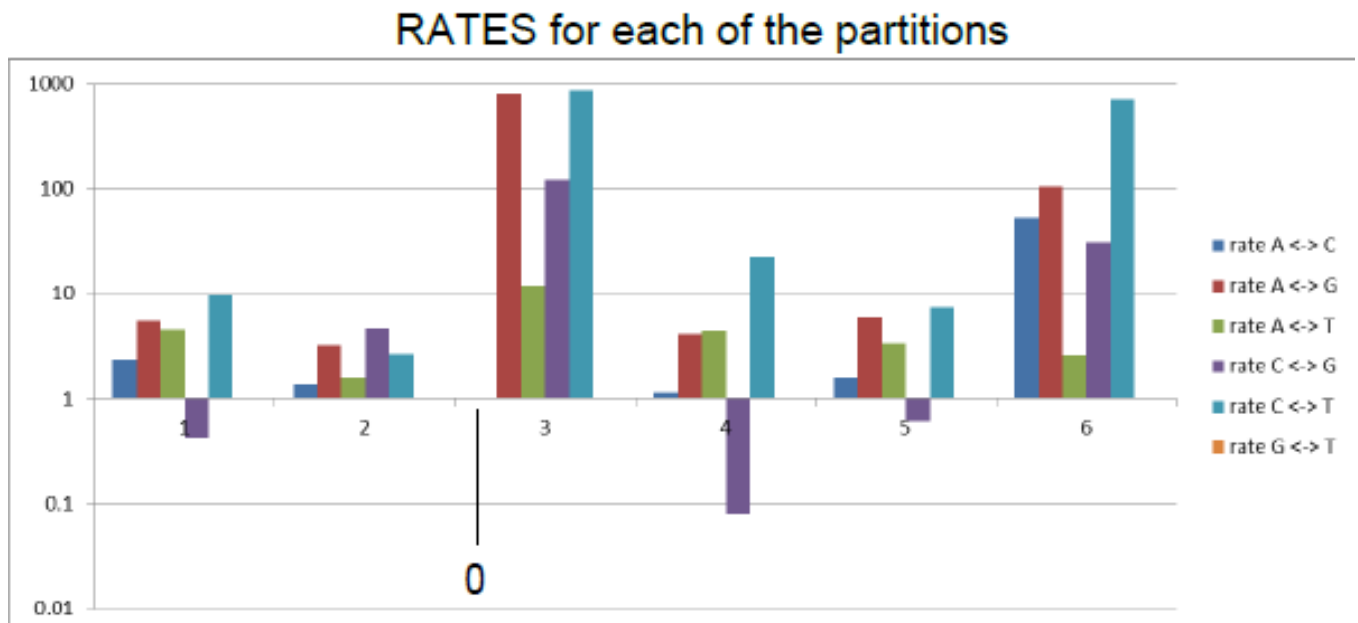

B)

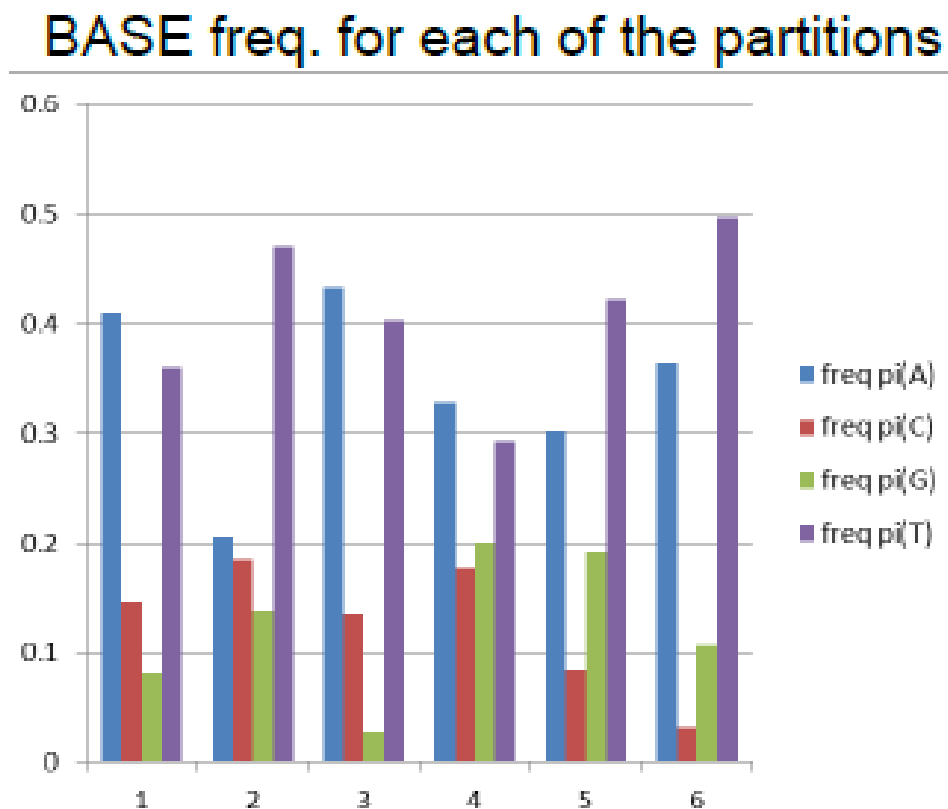

**Supplementary Table S4.** Final RAxML maximum likelihood optimisation scores for the analyses of each of the 15 datasets. Analyses of datasets containing all genes are shown in grey.

| <b>Dataset</b>                                                                | <b>Final ML Optimisation Likelihood</b> |
|-------------------------------------------------------------------------------|-----------------------------------------|
| All genes partitionjed by gene (A1)                                           | -773731.4614                            |
| All genes unpartitioned (A2)                                                  | -787772.9784                            |
| All genes, PartitionFinder (A3)                                               | -757964.9526                            |
| Only protein genes partitioned by gene (B1)                                   | -696122.2766                            |
| Only protein genes unpartitioned (B2)                                         | -684161.4211                            |
| Only protein genes Partition Finder (B3)                                      | -668479.6459                            |
| All genes, protein genes without 3rd codon position, partitioned by gene (C1) | -420952.3613                            |
| All genes, protein genes without 3rd codon position, unpartitioned (C2)       | -414851.3568                            |
| Only proteins genes without 3rd codon position, partitioned by gene (D1)      | -328068.0482                            |
| Only proteins genes without 3rd codon position, unpartitioned (D2)            | -331245.2996                            |
| All genes, proteins genes RY coded, partitioned by gene (E1)                  | -305075.4193                            |
| All genes, proteins genes RY coded, unpartitioned (E2)                        | -310588.2857                            |
| Only proteins genes RY coded, partitioned by gene (F1)                        | -218258.1401                            |
| Only proteins genes RY coded, unpartitioned (F2)                              | -219811.0759                            |
| Only protein genes RY coded PartitionFinder (E3)                              | -218339.2117                            |



# Supplementary Figure S6

Ultrametric RAxML tree of concatenated PCR 'bait' sequences, partitioned by gene.  
 Numbers indicate nodal support values from 1000 rapid bootstrap replicates.  
 Family and subfamily prefixes are according to Figure 5 in main text.

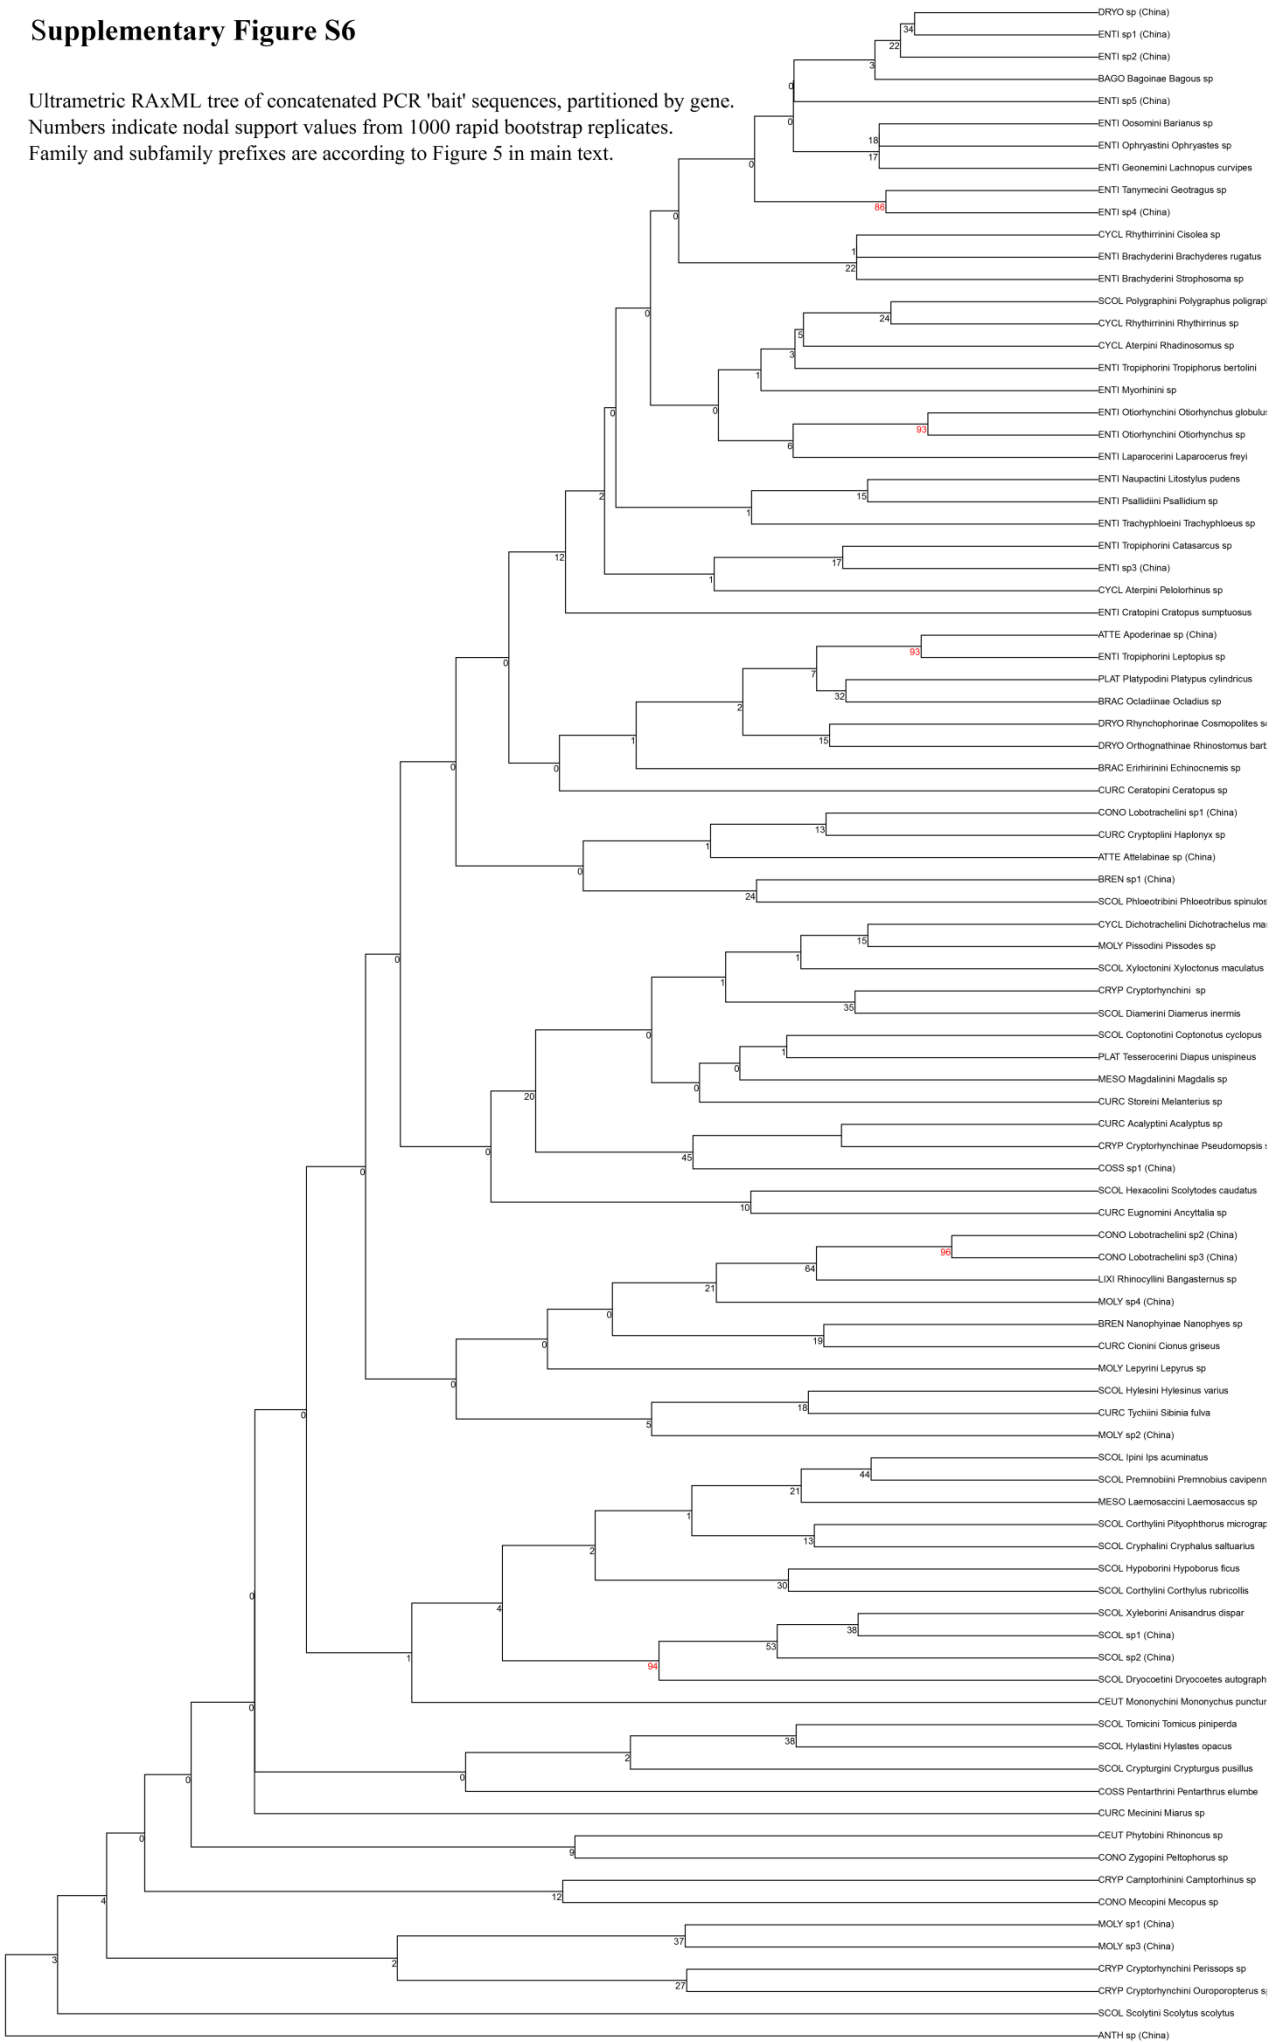

**Supplementary Table S7.** Test of compositional heterogeneity using the chi-square test measuring significance as implemented in PAUP (Swofford 2001) and using the significance test implemented in Foster (2004) that uses simulations for generating a null model distribution. Tests were performed on all sites and after RY recoding of 1<sup>st</sup> positions and removing 3<sup>rd</sup> positions.

| Gene         | All sites  | 1 <sup>st</sup> RY coded, 3 <sup>rd</sup> removed |        |
|--------------|------------|---------------------------------------------------|--------|
|              | PAUP       | PAUP                                              | Foster |
| Concatenated | 0          | 0                                                 | 0      |
| <i>nad2</i>  | 0          | 0.0181846                                         | 0      |
| <i>cox1</i>  | 0          | 1                                                 | 0.01   |
| <i>cox2</i>  | 7.59E-07   | 1                                                 | 0.01   |
| <i>atp8</i>  | 0.188122   | 0.972425                                          | 0      |
| <i>atp6</i>  | 0          | 1                                                 | 0      |
| <i>cox3</i>  | 0          | 1                                                 | 0.4    |
| <i>nad3</i>  | 5.53E-07   | 1                                                 | 0.03   |
| <i>nad5</i>  | 0          | 1.06E-13                                          | 0      |
| <i>nad4</i>  | 0          | 0.893078                                          | 0      |
| <i>nad4L</i> | 0.00353768 | 0.998908                                          | 0.02   |
| <i>nad6</i>  | 0          | 0.0612167                                         | 0      |
| <i>cytB</i>  | 0          | 1                                                 | 0.13   |
| <i>nad1</i>  | 0          | 1                                                 | 0.25   |

## Supplementary Figure S8

Ultrametric RAxML tree of the four concatenated reverse-strand transcribed protein-coding genes, partitioned by gene. Numbers indicate nodal support values from 1000 rapid bootstrap replicates. Family and subfamily prefixes are according to Figure 5 in main text.

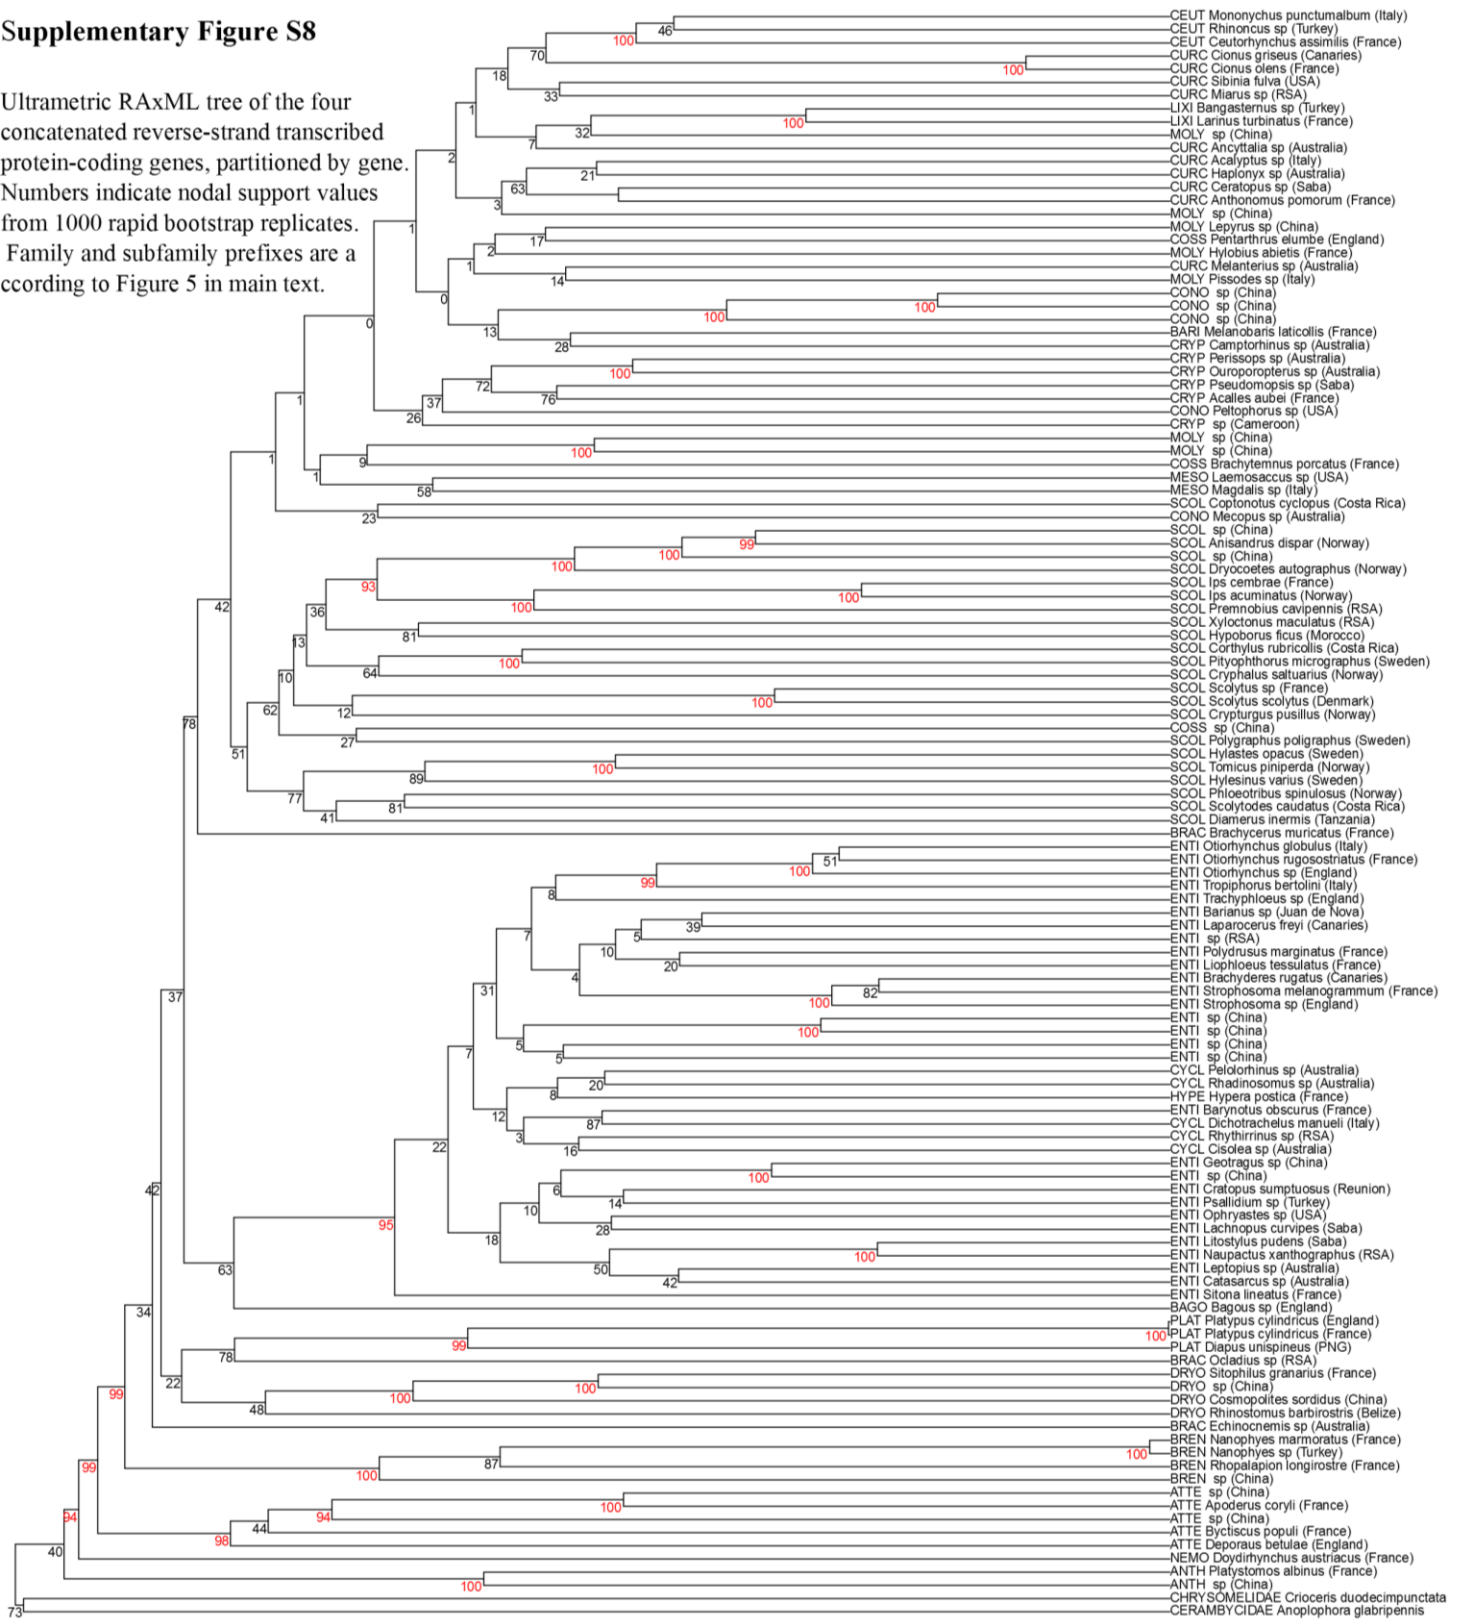

## Supplementary Figure S9

Ultrametric RAxML tree of the nine concatenated forward-strand transcribed protein-coding genes, partitioned by gene. Numbers indicate nodal support values from 1000 rapid bootstrap replicates. Family and subfamily prefixes are according to Figure 5 in main text.

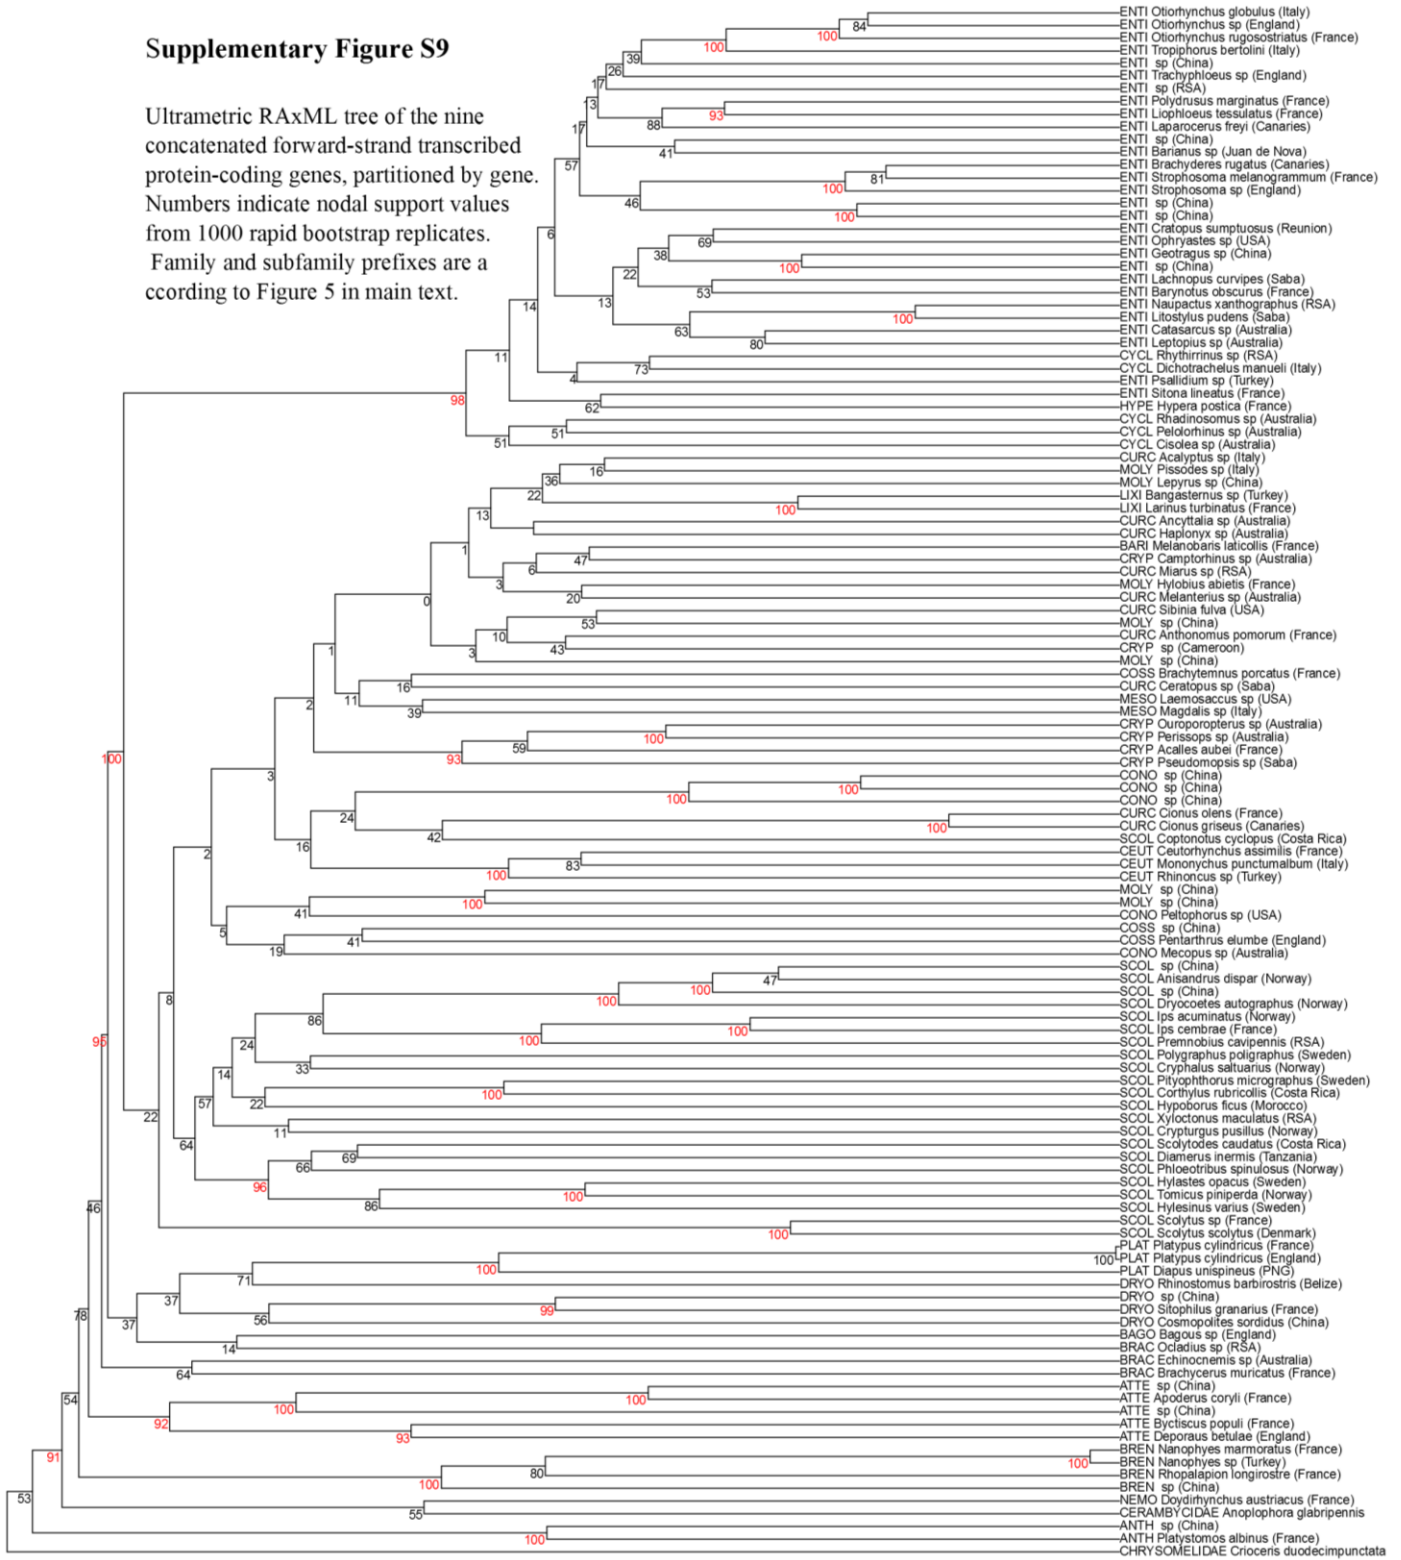

**Supplementary Table S10.** Primers (A), PCR reaction mixes (B) and cycling conditions (C) for the *cox1*, *cytB* and *rrnL* ‘bait’ fragment amplifications.

**A)**

| Primer name      | Marker         | Dir. | Primer sequence 5'=>3'                       | Anneal Temp. | Length (kbp) |
|------------------|----------------|------|----------------------------------------------|--------------|--------------|
| M13REV-FOLbeetF2 | <i>cox1</i> 5' | Fwd. | CAGGAAACAGCTATGACCTTYTCWACNAAYCAYAARGAYATYGG | 52°C         | 0.7          |
| M13(-21)-FOLbeR2 | <i>cox1</i> 5' | Rev. | TGTA AACGACGGCCAGTTANACTTCWGGRTGNCCRAARAAYCA |              |              |
| M13REV           | Sequencing     | Fwd. | CAGGAAACAGCTATGACC                           | 50°C         | 0.7          |
| M13(-21)         | Sequencing     | Rev. | TGTA AACGACGGCCAGT                           |              |              |
| Jerry            | <i>cox1</i> 3' | Fwd. | CAACATTTATTTTGATTTTTTGG                      | 53°C         | 0.8          |
| Stev_pat_R       | <i>cox1</i> 3' | Rev. | GCACTAWTCTGCCATATTAGA                        |              |              |
| SytB_F           | <i>cytB</i>    | Fwd. | TGAGGNCAAATATCHTTTGTGAGG                     | 55°C         | 0.5          |
| SytB_R           | <i>cytB</i>    | Rev. | GCAAATARRAARTATCATTCDGG                      |              |              |
| LRJ-12961        | <i>rrnL</i>    | Fwd. | TTTAATCCAACATCGAGG                           | 50°C         | 0.45         |
| LRJ-12887        | <i>rrnL</i>    | Fwd. | CCGGTCTGAACTCAGATCACGT                       |              |              |
| LRN-13398        | <i>rrnL</i>    | Rev. | CGCCTGTTTAAACAAAACAT                         |              |              |

\* PCR products amplified with M13REV-FOLbeetF2 were sequenced using M13REV

\*\* PCR products amplified with M13(-21)-FOLbeR2 were sequenced using M13(-21)

**B)**

| PCR Component                 | <i>cox1</i> 5' X1 (μl) | <i>cox13'</i> X1 (μl) | <i>cytB</i> X1 (μl) | <i>rrnL</i> X1 (μl) |
|-------------------------------|------------------------|-----------------------|---------------------|---------------------|
| ddH <sub>2</sub> O            | 15.925                 | 18.15                 | 18.15               | 18.8                |
| NH <sub>4</sub> buffer X10    | 2.5                    | 2.5                   | 2.5                 | 2.5                 |
| MgCl <sub>2</sub> (50mM)      | 1.5                    | 1.0                   | 1.0                 | 1.0                 |
| dNTPs (10mM total/2.5mM each) | 2.0                    | 1.0                   | 1.0                 | 1.0                 |
| Forward primer (10μM)         | 1.0                    | 0.625                 | 0.625               | 0.6                 |
| Reverse primer (10μM)         | 1.0                    | 0.625                 | 0.625               | 0.6                 |
| Taq polymerase                | 0.075                  | 0.1                   | 0.1                 | 0.1                 |
| DNA                           | 1.0                    | 1.0                   | 1.0                 | 1.0                 |
| Total volume                  | 25.0                   | 25.0                  | 25.0                | 25.6                |



C)

|                        | <i>cox1 5'</i> |        | <i>cox1 3'</i> |         | <i>cytB</i> |         | <i>rrnL</i> |        |
|------------------------|----------------|--------|----------------|---------|-------------|---------|-------------|--------|
|                        | Temp.          | Time   | Temp.          | Time    | Temp.       | Time    | Temp.       | Time   |
| <b>Initialisation</b>  | 95°C           | 2 mins | 94°C           | 2 mins  | 94°C        | 5 mins  | 94°C        | 5 mins |
| <b>Denaturation</b>    | 95°C           | 1m     | 94°C           | 30s     | 94°C        | 30s     | 94°C        | 30s    |
| <b>Annealing</b>       | 52°C           | 45s    | 53°C           | 30s     | 55°C        | 30s     | 50°C        | 30s    |
| <b>Extension</b>       | 72°C           | 1m     | 70°C           | 1m      | 70°C        | 1m      | 72°C        | 30s    |
| <b>Final extension</b> | 72°C           | 5 mins | 72°C           | 10 mins | 72°C        | 10 mins | 72°C        | 7 mins |
| <b>Final hold</b>      | 10°C           | ∞      | 10°C           | ∞       | 10°C        | ∞       | 10°C        | ∞      |
