# Supplementary material for: Bulk De Novo Mitogenome Assembly from Pooled Total DNA Elucidates the Phylogeny of Weevils (Coleoptera: Curculionoidea)
Source: PubMed Central journal article supplement (PMC4104315; doi:10.1093/molbev/msu154), 2014-05-06
Supplement: supp_msu154_Supplementary_Table_S2.pdf [file supp_msu154_Supplementary_Table_S2.pdf]

## SUPPLEMENTARY MATERIAL

### Supplementary Table S2.

Results of identification of mitogenomic assemblies by BLAST searching ‘bait’ sequences against corresponding *cox1* 5’, *cox1* 3’, *cytB* and *rrnL* sequences from new assemblies. In grey are indicated successful assembly identifications. Numbers in the bait columns denote the unique identification numbers for the assemblies with the best ‘hit’ to each bait. Total number of baits available and number of successful ‘hits’ per sample is shown. For unsuccessful assembly identifications the reason for failure is given.

\* Conspecific samples CG343 and CG317 resulted in a single mitogenomic assembly.

| SAMPLE | <i>cox1</i> 5' BAIT | <i>cox1</i> 3' BAIT | <i>cytB</i> BAIT | <i>rrnL</i> BAIT | TOTAL BAITS | TOTAL BAIT HITS | I.D. SUCCESS? | REASON FOR I.D. FAIL |
|--------|---------------------|---------------------|------------------|------------------|-------------|-----------------|---------------|----------------------|
| CG031  |                     |                     |                  |                  | 1           | 0               | n             | No bait hits         |
| CG052  | 181                 | 181                 | 181              | 181              | 4           | 4               | y             |                      |
| CG055  | 104                 | 104                 | 104              | 104              | 4           | 4               | y             |                      |
| CG069  | 180                 |                     | 180              | 180              | 3           | 3               | y             |                      |
| CG074  | 112                 | 112                 | 112              | 112              | 4           | 4               | y             |                      |
| CG205  |                     |                     |                  |                  | 3           | 0               | n             | No bait hits         |
| CG206  | 91                  | 91                  | 42               | 457514           | 4           | 4               | n             | Short assemblies     |
| CG210  | 156                 | 156                 | 156              | 156              | 4           | 4               | y             |                      |
| CG212  | 197                 |                     | 62               | 74               | 3           | 3               | n             | Short assemblies     |
| CG213  | 7                   |                     |                  |                  | 3           | 1               | n             | Short assemblies     |
| CG215  |                     |                     |                  |                  | 4           | 0               | n             | No bait hits         |
| CG220  | 183                 |                     |                  |                  | 1           | 1               | y             |                      |
| CG221  | 114                 | 114                 |                  |                  | 2           | 2               | y             |                      |
| CG222  | 150                 | 150                 |                  | 150              | 3           | 3               | y             |                      |
| CG223  |                     |                     |                  |                  | 1           | 0               | n             | No bait hits         |
| CG224  |                     |                     |                  |                  | 2           | 0               | n             | No bait hits         |
| CG225  | 4                   | 4                   |                  |                  | 2           | 2               | n             | Short assemblies     |
| CG226  |                     |                     | 100-27           |                  | 1           | 1               | y             |                      |
| CG227  |                     |                     | 89               |                  | 1           | 1               | y             |                      |
| CG229  | 100-31              | 100-31              | 100-31           |                  | 3           | 3               | y             |                      |
| CG230  | 251327              | 251327              |                  |                  | 3           | 2               | n             | Short assemblies     |
| CG231  |                     |                     |                  |                  | 2           | 0               | n             | No bait hits         |
| CG232  | 457690              | 457690              | 59               | 59               | 4           | 4               | n             | Short assemblies     |

|       |         |         |        |       |   |   |   |                  |
|-------|---------|---------|--------|-------|---|---|---|------------------|
| CG235 | 459182  |         | 459182 |       | 2 | 2 | y |                  |
| CG236 | 41      |         |        |       | 1 | 1 | n | Short assemblies |
| CG237 |         |         |        |       | 3 | 0 | n | No bait hits     |
| CG238 | 173     | 173     |        |       | 2 | 2 | y |                  |
| CG239 |         |         |        |       | 3 | 0 | n | No bait hits     |
| CG240 | 177     | 177     |        |       | 2 | 2 | y |                  |
| CG241 |         |         |        |       | 3 | 0 | n | No bait hits     |
| CG242 |         | 154     | 154    | 154   | 3 | 3 | y |                  |
| CG243 |         |         |        |       | 1 | 0 | n | No bait hits     |
| CG244 |         |         |        |       | 4 | 0 | n | No bait hits     |
| CG245 |         |         |        |       | 2 | 0 | n | No bait hits     |
| CG246 |         |         |        |       | 4 | 0 | n | No bait hits     |
| CG247 | 43      | 43      | 79     |       | 3 | 3 | y |                  |
| CG248 |         | 100-14  |        |       | 1 | 1 | y |                  |
| CG249 |         |         |        |       | 4 | 0 | n | No bait hits     |
| CG250 |         |         |        |       | 3 | 0 | n | No bait hits     |
| CG252 |         | 51      | 251254 |       | 3 | 2 | n | Short assemblies |
| CG253 | 82      | 82      |        | 82    | 3 | 3 | y |                  |
| CG254 |         | 5       |        |       | 1 | 1 | n | Short assembly   |
| CG255 |         |         |        |       | 1 | 0 | n | No bait hits     |
| CG257 | 176     | 176     |        | 176   | 3 | 3 | y |                  |
| CG258 | 191     | 191     | 200    |       | 4 | 3 | n | Short assemblies |
| CG259 |         |         |        |       | 1 | 0 | n | No bait hits     |
| CG260 | 100-665 |         |        |       | 2 | 1 | n | Short assemblies |
| CG261 |         |         |        |       | 4 | 0 | n | No bait hits     |
| CG263 |         |         |        |       | 1 | 0 | n | No bait hits     |
| CG264 |         |         |        |       | 4 | 0 | n | No bait hits     |
| CG265 |         |         |        |       | 1 | 0 | n | No bait hits     |
| CG266 |         |         |        |       | 3 | 0 | n | No bait hits     |
| CG267 |         |         | 84     |       | 2 | 1 | n | Short assemblies |
| CG268 | 100-2   | 100-2   | 100-2  | 100-2 | 4 | 4 | y |                  |
| CG269 | 214     | 214     |        | 73    | 4 | 3 | n | Short assemblies |
| CG270 | 100-337 | 100-337 | 459069 |       | 4 | 3 | n | Short assemblies |

|       |        |        |        |        |   |   |   |                  |
|-------|--------|--------|--------|--------|---|---|---|------------------|
| CG271 |        | 44     | 44     | 44     | 3 | 3 | y |                  |
| CG272 | 96     | 96     | 96     | 96     | 4 | 4 | y |                  |
| CG274 |        |        |        |        | 4 | 0 | n | No bait hits     |
| CG275 |        |        |        |        | 3 | 0 | n | No bait hits     |
| CG276 |        |        |        |        | 4 | 0 | n | No bait hits     |
| CG277 | 201    | 201    |        |        | 4 | 2 | n | Short assemblies |
| CG278 | 203    | 203    | 189    |        | 3 | 3 | n | Short assemblies |
| CG279 |        | 41     | 60     | 457037 | 4 | 3 | n | Short assemblies |
| CG280 |        | 31     | 94     |        | 3 | 2 | n | Short assemblies |
| CG281 |        | 67     | 14     |        | 4 | 2 | n | Short assemblies |
| CG282 | 130    | 130    | 130    | 130    | 4 | 4 | y |                  |
| CG283 |        | 127    |        | 127    | 2 | 2 | y |                  |
| CG284 | 100-26 | 100-26 | 100-26 |        | 3 | 3 | y |                  |
| CG285 | 182    | 182    |        |        | 2 | 2 | y |                  |
| CG286 |        |        | 13     |        | 3 | 1 | n | Short assemblies |
| CG287 |        |        |        |        | 3 | 0 | n | No bait hits     |
| CG288 | 100-6  |        | 100-6  |        | 2 | 2 | y |                  |
| CG289 | 120    | 120    | 458630 | 458630 | 4 | 4 | y |                  |
| CG290 |        |        |        |        | 1 | 0 | n | No bait hits     |
| CG291 |        |        |        |        | 1 | 0 | n | No bait hits     |
| CG293 | 146    |        | 146    |        | 2 | 2 | y |                  |
| CG295 | 145    | 145    | 145    |        | 3 | 3 | y |                  |
| CG296 | 175    | 175    |        |        | 2 | 2 | y |                  |
| CG297 | 153    | 153    | 153    |        | 3 | 3 | y |                  |
| CG298 | 147    | 147    | 147    |        | 3 | 3 | y |                  |
| CG299 | 25     | 25     |        |        | 4 | 2 | n | Short assemblies |
| CG300 | 134B   | 134B   | 134B   | 134B   | 4 | 4 | y |                  |
| CG301 | 113    | 113    | 113    | 113    | 4 | 4 | y |                  |
| CG302 |        |        |        |        | 3 | 0 | n | No bait hits     |
| CG303 |        |        |        |        | 3 | 0 | n | No bait hits     |
| CG304 |        |        | 195    | 195    | 4 | 2 | n | Short assemblies |
| CG305 |        | 148    |        |        | 1 | 1 | y |                  |
| CG306 |        | 458889 | 458889 | 129    | 3 | 3 | y |                  |

|       |     |        |        |         |   |   |   |                    |
|-------|-----|--------|--------|---------|---|---|---|--------------------|
| CG307 |     | 142    | 142    | 142     | 3 | 3 | y |                    |
| CG308 |     |        |        |         | 1 | 0 | n | No bait hits       |
| CG309 | 108 | 108    | 108    | 100-231 | 4 | 4 | y |                    |
| CG310 |     | 34     | 40     |         | 4 | 2 | n | Short assemblies   |
| CG311 | 95  | 95     | 95     |         | 4 | 3 | y |                    |
| CG312 | 144 | 144    | 144    | 144     | 4 | 4 | y |                    |
| CG313 |     |        |        | 147     | 1 | 1 | n | Ambiguous 16S hits |
| CG314 |     |        |        | 147     | 4 | 1 | n | Ambiguous 16S hits |
| CG315 | 126 | 126    | 126    | 126     | 4 | 4 | y |                    |
| CG316 |     | 50     |        |         | 3 | 1 | n | Short assemblies   |
| CG317 |     | 81     | 81     | 81      | 3 | 3 | y |                    |
| CG318 |     |        |        |         | 3 | 0 | n | No bait hits       |
| CG319 |     |        |        | 165     | 1 | 1 | y |                    |
| CG320 |     |        |        |         | 2 | 0 | n | No bait hits       |
| CG321 |     |        | 100-94 |         | 1 | 1 | y |                    |
| CG322 |     |        | 123    |         | 1 | 1 | y |                    |
| CG323 |     |        | 80     | 80      | 2 | 2 | y |                    |
| CG324 |     |        |        | 110     | 1 | 1 | y |                    |
| CG325 | 117 | 117    | 117    |         | 3 | 3 | y |                    |
| CG326 |     |        |        |         | 2 | 0 | n | No bait hits       |
| CG327 |     | 206    |        |         | 4 | 1 | n | Short assemblies   |
| CG328 |     |        | 163    | 163     | 2 | 2 | y |                    |
| CG329 |     |        | 246528 |         | 1 | 1 | n | Short assemblies   |
| CG330 |     |        | 100-25 | 100-25  | 2 | 2 | y |                    |
| CG331 | 119 | 119    | 119    | 119     | 4 | 4 | y |                    |
| CG332 |     | 100-28 | 100-28 | 100-28  | 3 | 3 | y |                    |
| CG333 |     |        | 36     |         | 1 | 1 | n | Short assembly     |
| CG334 |     |        |        |         | 1 | 0 | n | No bait hits       |
| CG335 |     |        | 75     |         | 1 | 1 | y |                    |
| CG336 |     | 160    |        |         | 1 | 1 | y |                    |
| CG337 |     |        |        |         | 1 | 0 | n | No bait hits       |
| CG338 |     |        | 10     |         | 1 | 1 | n | Short assembly     |
| CG339 |     | 149    | 149    | 149     | 3 | 3 | y |                    |

|       |     |     |        |     |   |   |    |                  |
|-------|-----|-----|--------|-----|---|---|----|------------------|
| CG340 |     | 141 | 141    | 141 | 3 | 3 | y  |                  |
| CG341 |     | 152 | 152    |     | 2 | 2 | y  |                  |
| CG342 |     | 162 | 162    | 162 | 3 | 3 | y  |                  |
| CG343 |     | 81  | 81     |     | 2 | 2 | y* |                  |
| CG344 |     |     | 101    | 101 | 2 | 2 | y  |                  |
| CG346 | 161 |     | 161    | 161 | 3 | 3 | y  |                  |
| CG347 |     | 178 | 178    |     | 2 | 2 | y  |                  |
| CG348 |     |     |        |     | 3 | 0 | n  | No bait hits     |
| CG349 |     |     | 168    | 168 | 2 | 2 | y  |                  |
| CG350 |     | 164 | 164    | 164 | 3 | 3 | y  |                  |
| CG351 |     |     | 56     |     | 2 | 1 | y  |                  |
| CG352 |     |     | 115    | 115 | 2 | 2 | y  |                  |
| CG353 |     |     | 457326 |     | 1 | 1 | n  | Short assemblies |
| CG354 |     | 139 | 139    | 139 | 3 | 3 | y  |                  |
| CG355 |     | 107 | 143    | 143 | 3 | 3 | y  |                  |
| CG412 |     |     |        |     | 1 | 0 | n  | No bait hits     |
| CG414 |     |     |        |     | 3 | 0 | n  | No bait hits     |
| CG415 |     | 102 | 185    |     | 2 | 2 | y  |                  |
| CG418 |     |     |        |     | 1 | 0 | n  | No bait hits     |
| CG419 |     |     | 124    | 124 | 2 | 2 | y  |                  |
| CG420 |     | 172 |        | 172 | 2 | 2 | y  |                  |
| CG421 |     |     |        |     | 3 | 0 | n  | No bait hits     |
| CG422 |     | 76  | 190    | 190 | 3 | 3 | y  |                  |
| CG423 |     | 137 | 137    | 137 | 3 | 3 | y  |                  |
| CG424 |     | 116 | 116    |     | 2 | 2 | y  |                  |
| CG425 |     | 151 | 151    |     | 2 | 2 | y  |                  |
| CG426 |     | 158 | 158    |     | 2 | 2 | y  |                  |
| CG427 |     | 210 |        |     | 3 | 1 | n  | Short assemblies |
| CG428 |     |     | 169    | 169 | 2 | 2 | y  |                  |
| CG429 |     | 118 |        |     | 1 | 1 | y  |                  |
| CG430 |     | 93  |        |     | 3 | 1 | n  | Short assemblies |
| CG431 |     | 109 | 109    | 109 | 3 | 3 | y  |                  |
| CG432 |     |     | 193    | 193 | 3 | 2 | n  | Short assemblies |

|           |      |        |         |        |   |   |   |                  |
|-----------|------|--------|---------|--------|---|---|---|------------------|
| CG434     |      |        | 157     |        | 1 | 1 | y |                  |
| CG435     |      | 155    | 155     |        | 2 | 2 | y |                  |
| CG436     |      | 77     | 77      | 77     | 3 | 3 | y |                  |
| CG437     |      | 122    | 122     | 122    | 3 | 3 | y |                  |
| CG438     |      | 136    | 136     |        | 2 | 2 | y |                  |
| CG439     |      |        | 184     | 184    | 2 | 2 | y |                  |
| CG440     |      |        |         |        | 1 | 0 | n | No bait hits     |
| CG441     |      |        |         | 159    | 1 | 1 | y |                  |
| CG442     |      | 174    | 174     |        | 2 | 2 | y |                  |
| CG443     |      | 457110 | 100-215 | 250606 | 3 | 3 | n | Short assemblies |
| CG444     |      |        |         | 135    | 1 | 1 | y |                  |
| CG445     |      | 170    |         | 170    | 2 | 2 | y |                  |
| CG446     |      |        |         |        | 1 | 0 | n | No bait hits     |
| CG447     | 61   |        |         | 52     | 2 | 2 | n | Non-weevil       |
| CG448     |      |        |         |        | 2 | 0 | n | No bait hits     |
| LAP007    | 98   | 98     | 98      |        | 3 | 3 | y |                  |
| N28       | 134A |        |         | 134A   | 2 | 2 | y |                  |
| T-Reu3834 |      | 140    | 140     | 140    | 3 | 3 | y |                  |
